# Supplementary material
Source: Springer Nature journal article supplement (https://www.springermedizin.de/resource/supplementary/12974_2014_991_MOESM2_ESM.pdf/9600576)

**A**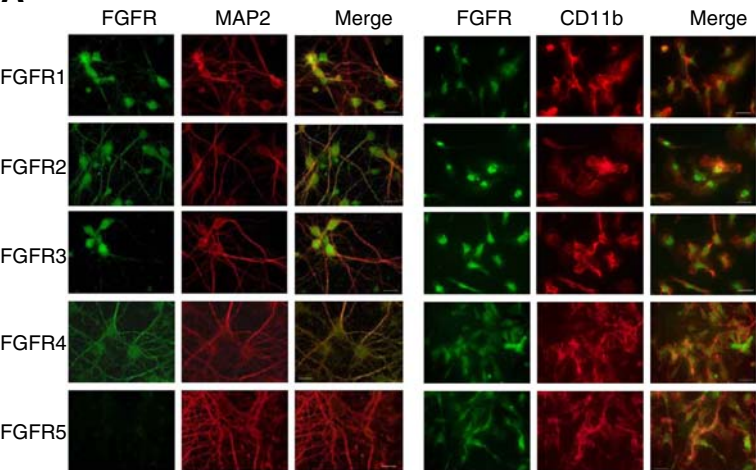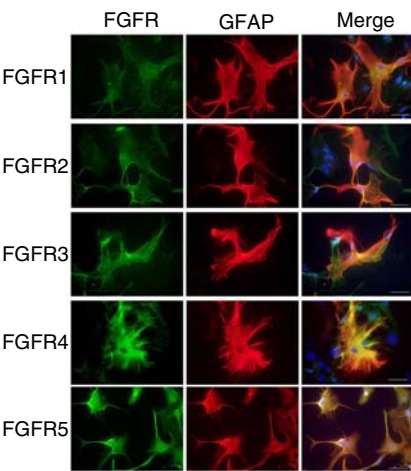**B**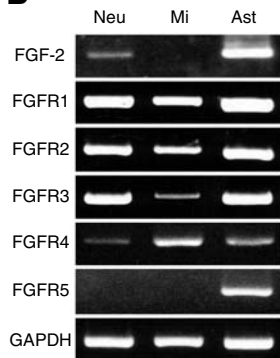

Supplement: MOESM2 [file 9600576]
